# Supplementary material for: Vertical finger-like asymmetric supercapacitors for enhanced performance at high mass loading and inner integrated photodetecting systems
Source: Royal Society of Chemistry journal article supplement (doi:10.1039/c7ta06306g), 2017-01-01
Supplement: c7ta06306g1.pdf [file c7ta06306g1.pdf]

## Supporting Information

# Vertically Fingerlike Asymmetric Supercapacitors for Enhanced Performance at Higher Mass Loading and Inner Integrated Photodetecting Systems

Siliang Wang,<sup>a</sup> Nishuang Liu,<sup>\*a</sup> Jiangyu Rao,<sup>a</sup> Yang Yue,<sup>a</sup> Kaifei Gao,<sup>a</sup> Jun Su,<sup>a</sup> Luying Li,<sup>a</sup>  
Xueliang Jiang,<sup>b</sup> Zhitian Liu<sup>b</sup> and Yihua Gao<sup>\*ac</sup>

<sup>a</sup>Center for Nanoscale Characterization & Devices (CNCD), Wuhan National Laboratory for Optoelectronics (WNLO) & School of Physics, Huazhong University of Science and Technology (HUST), Luoyu Road 1037, Wuhan 430074, P. R. China

Email: gaoyihua@hust.edu.cn; nishuang\_liu@foxmail.com

<sup>b</sup>School of Material Science & Engineering, Wuhan Institute of Technology, Liufang Road 1, Wuhan 430205, P. R. China

<sup>c</sup>College of Physics Science & Technology, Guangxi University, Daxue Road 100, Nanning 530004, P. R. China

The volumetric capacitance of the device can be calculated from CV results by the following equations:

$$C = A / (2 \times s \times \Delta U) \quad (1)$$

$$C_V = C / V = A / (2 \times s \times V \times \Delta U) \quad (2)$$

Where  $C$  is the capacitance of the ASC,  $A$  is the area of CV curve,  $s$  is the scan rate,  $\Delta U$  is the potential window,  $C_V$  is the volumetric capacitance, and  $V$  is the total volume of the electrodes.

The volumetric capacitance of the device can be calculated from GCD results by the following equations:

$$C = I \times \Delta t / \Delta U \quad (3)$$

$$C_V = C / V = I \times \Delta t / (V \times \Delta U) \quad (4)$$

Where  $C$  is the capacitance of the ASC,  $I$  is the discharge current,  $\Delta t$  is the discharge time,  $\Delta U$  is the potential window during the discharge process,  $C_V$  is the volumetric capacitance, and  $V$  is the total volume of the electrodes.

The energy density and average power density derived from the GCD of the device can be calculated from the following equations:

$$D_E = 0.5 C_V (\Delta U)^2 \quad (5)$$

$$D_P = 3600 D_E / \Delta t \quad (6)$$

Where  $D_E$  is the energy density,  $C_V$  is the volumetric capacitance which can be obtained through Eq. 4,  $\Delta U$  is the potential window,  $D_P$  is the volumetric power density and  $\Delta t$  is the discharge time.

The capacity retention (CR) and Coulombic efficiency (CE) can be calculated from GCD results by the following equations:

$$CR = \Delta t / \Delta t_0 \quad (7)$$

$$CE = \Delta t_d / \Delta t_c \quad (8)$$

Where  $\Delta t$  is the discharge time of different cycles,  $\Delta t_0$  is initial discharge time,  $\Delta t_d$  is the discharge time and  $\Delta t_c$  is the charge time in same cycle.

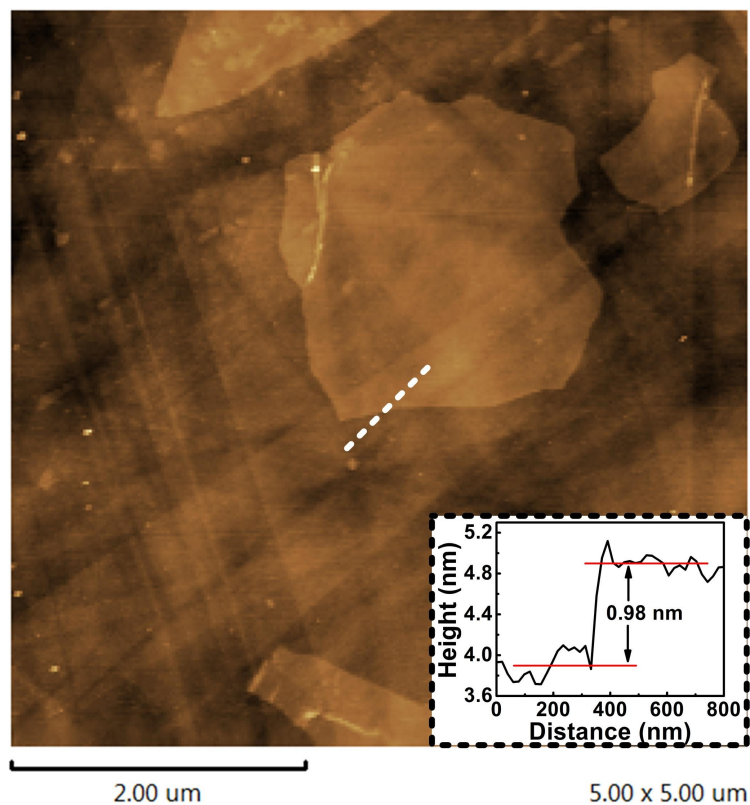

**Fig. S1** AFM image and height profile of GO.

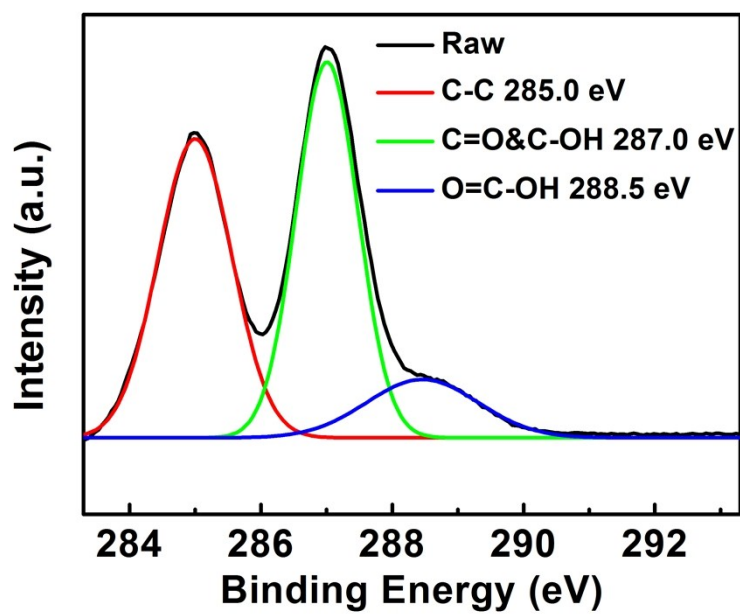

**Fig. S2** C1s XPS spectra of GO.

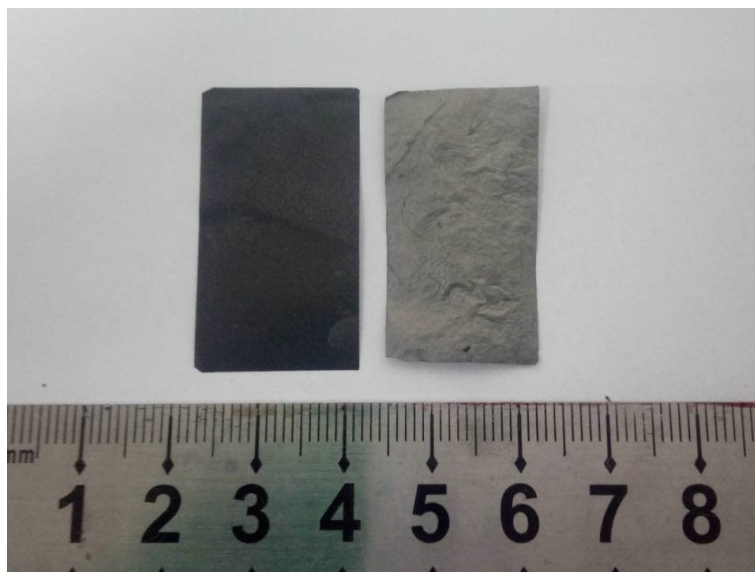

**Fig. S3** Photographs of RGO film before (left) and after (right) being annealed.

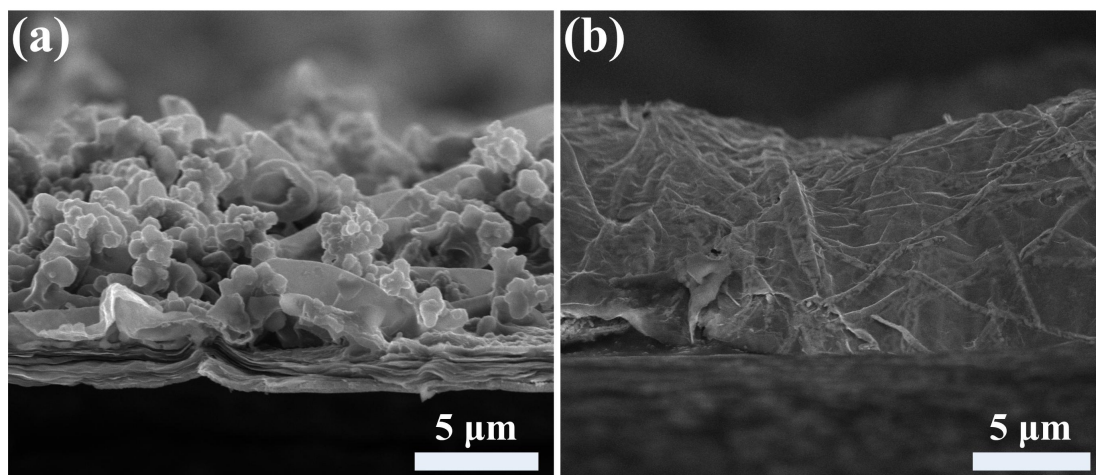

**Fig. S4** Side views of positive and negative electrodes. (a) RGO-MnO<sub>2</sub>-PPy, the thickness is 10 μm. (b) RGO-MoO<sub>3</sub>, the thickness is 12 μm.

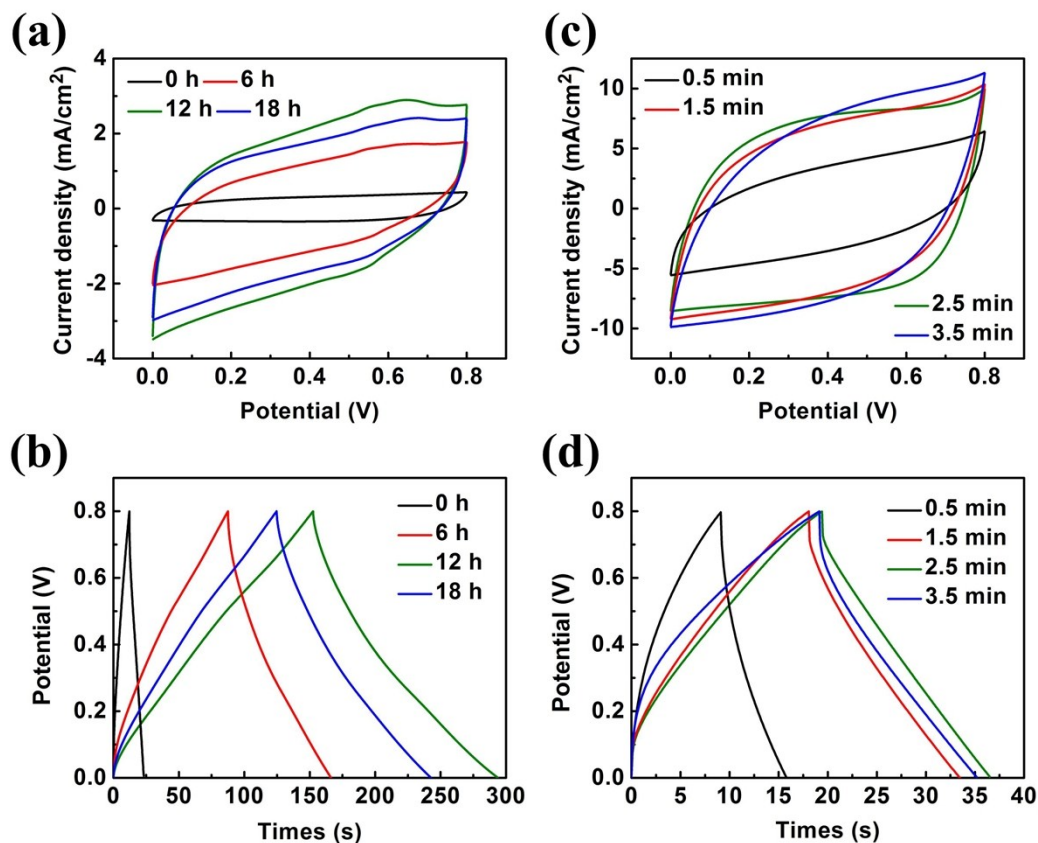

**Fig. S5** Electrochemical performances of RGO based electrodes. (a) CV curves (scan rate: 50 mV s<sup>-1</sup>) and (b) GCD curves (current density: 0.4 mA cm<sup>-2</sup>) of RGO-MnO<sub>2</sub> electrodes with various MnO<sub>2</sub> deposition times. (c) CV curves (scan rate: 50 mV s<sup>-1</sup>) and (d) GCD curves (current density: 6.4 mA cm<sup>-2</sup>) of RGO-MnO<sub>2</sub>-PPy electrodes with various PPy deposition times.

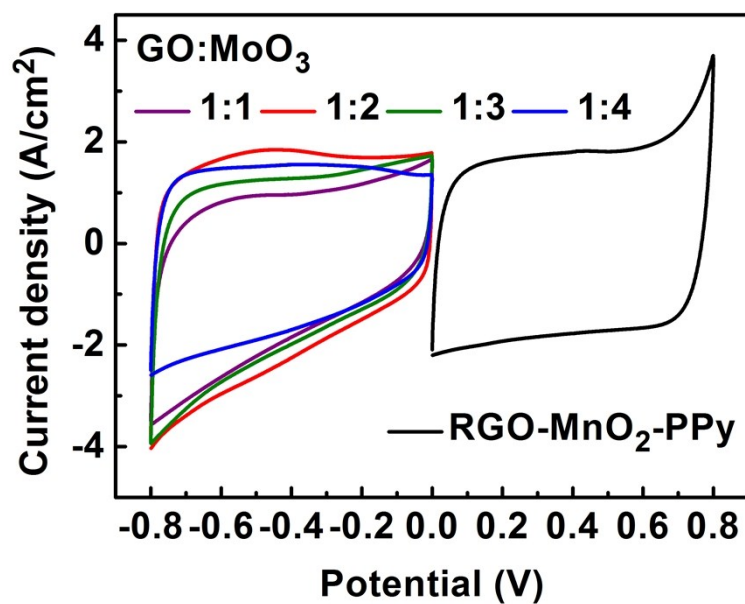

**Fig. S6** CV curves of RGO-MnO<sub>2</sub>-PPy and RGO-MoO<sub>3</sub> (various ratios) at a scan rate of 10 mV s<sup>-1</sup>.

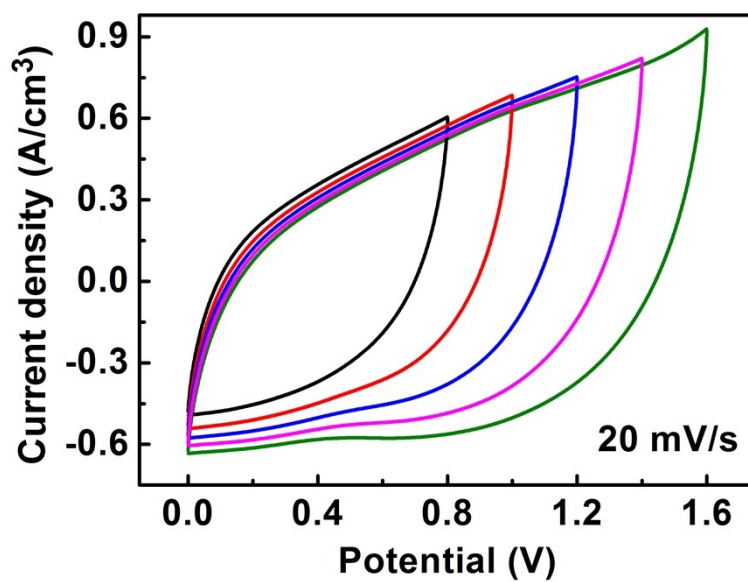

**Fig. S7** CV curves of the ASC in various potential windows.

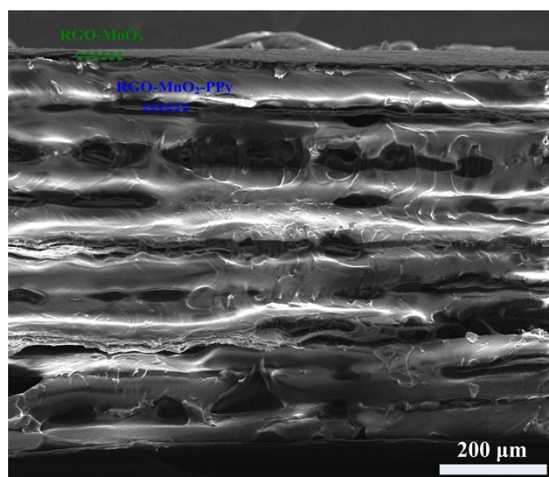

**Fig. S8** Side view of VFASC with 10 fingerlike electrodes. The RGO-MnO<sub>2</sub>-PPy positive electrodes and RGO-MoO<sub>3</sub> negative electrodes were stacked one by one.

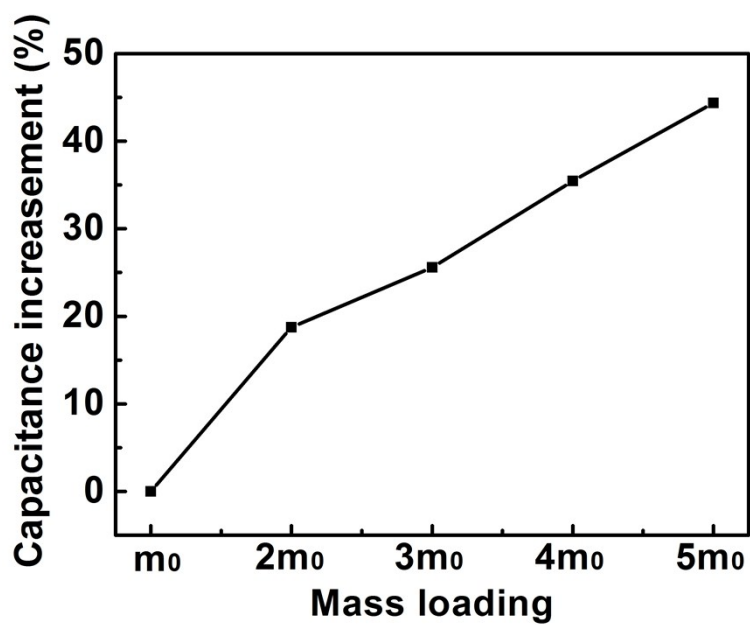

**Fig. S9** Capacitance increase vs mass loading.

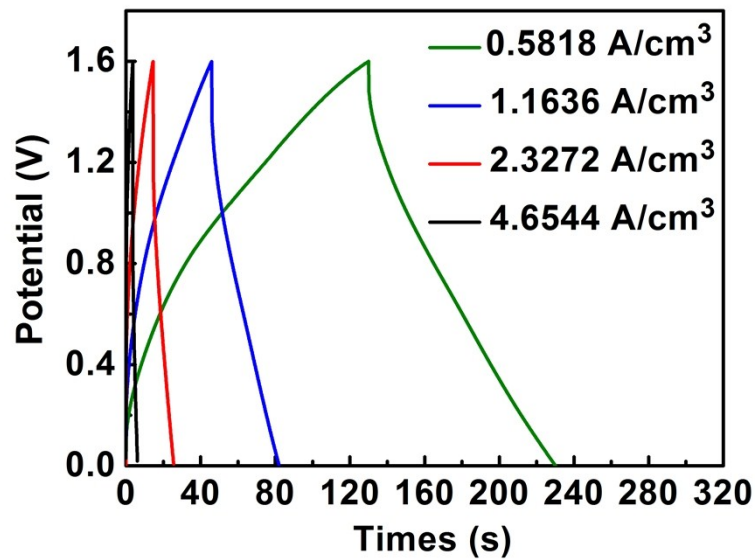

**Fig.S10** GCD curves of the VFASC at various current densities.

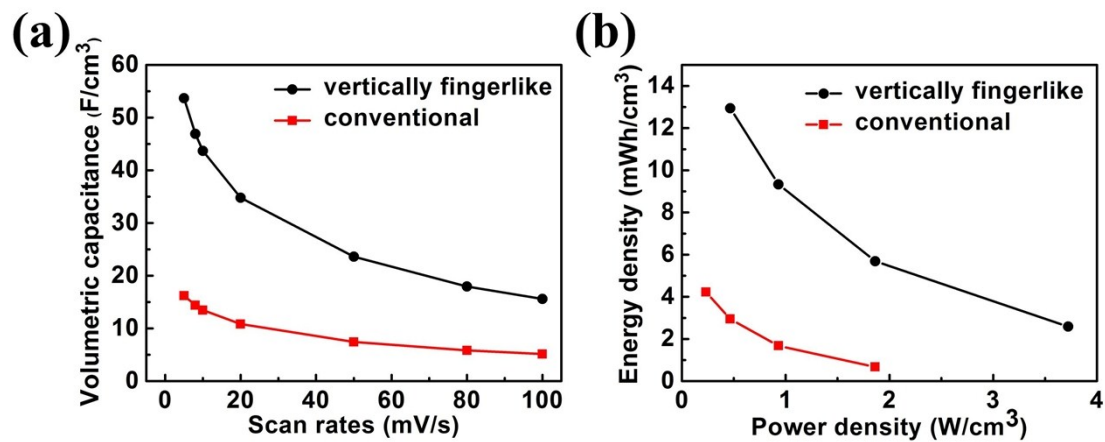

**Fig.S11** The comparison of electrochemical performance for vertically fingerlike and conventional asymmetric supercapacitors. (a) Volumetric capacitance vs. scan rate. (b) Energy and power density plot.
